1

2

3 Gene duplicates cause hybrid lethality between sympatric species of *Mimulus*

4

5 Matthew P. Zuellig<sup>1\*</sup> and Andrea L. Sweigart<sup>1</sup>

6

7 <sup>1</sup>Department of Genetics, University of Georgia, Athens, Georgia, United States of America

8

9 \*Corresponding Author

10 E-mail: zuelligm@gmail.com

11

## 12 **Abstract**

13 Hybrid incompatibilities play a critical role in the evolution and maintenance of species. We  
14 have discovered a simple genetic incompatibility that causes lethality in hybrids between two  
15 closely related species of yellow monkeyflower (*Mimulus guttatus* and *M. nasutus*). This hybrid  
16 incompatibility, which causes one sixteenth of F<sub>2</sub> hybrid seedlings to lack chlorophyll and die  
17 shortly after germination, occurs between sympatric populations that are connected by  
18 ongoing interspecific gene flow. Using complimentary genetic mapping and gene expression  
19 analyses, we show that lethality occurs in hybrids that lack a functional copy of the critical  
20 photosynthetic gene *pTAC14*. In *M. guttatus*, this gene was duplicated, but the ancestral copy is  
21 no longer expressed. In *M. nasutus*, the duplication is missing altogether. As a result, hybrids  
22 die when they are homozygous for the nonfunctional *M. guttatus* copy and missing the

23 duplicate from *M. nasutus*, apparently due to misregulated transcription of key photosynthetic  
24 genes. Our study indicates that neutral evolutionary processes may play an important role in  
25 the evolution of hybrid incompatibilities and opens the door to direct investigations of their  
26 contribution to reproductive isolation among naturally hybridizing species.

27

## 28 **Author Summary**

29 Hybrid incompatibilities play an important role in speciation, because they act to limit gene flow  
30 between species. Identifying the genes that underlie these barriers sheds light on the  
31 evolutionary forces and genetic mechanisms that give rise to new species. We identified a  
32 reproductive barrier that causes lethality in the F2 offspring of sympatric species of yellow  
33 monkeyflower (*Mimulus guttatus* and *M. nasutus*). We show that lethality occurs in hybrids that  
34 lack a functional copy of the critical photosynthetic gene *pTAC14*. This gene was duplicated in *M.*  
35 *guttatus*, but the ancestral copy subsequently lost function. In *M. nasutus*, no duplication  
36 occurred. As a consequence, F2 hybrids that are homozygous for non-functional *M. guttatus*  
37 copies at one locus and missing *M. nasutus* duplicates at the other locus completely lack  
38 functional *pTAC14* and die. Our data indicate that non-functionalization of ancestral *pTAC14* in  
39 *M. guttatus* occurred via neutral evolutionary change. These results suggest that neutral  
40 evolutionary forces may play an important role in speciation.

41

## 42 **Introduction**

43 Across diverse taxa, hybrid incompatibilities arise as a byproduct of genetic divergence  
44 among incipient species. The basic genetic underpinnings of this process are well understood:

45 two or more mutational differences between species interact epistatically to cause hybrid  
46 inviability or sterility [1-3]. However, what is less clear, and often very challenging to uncover, is  
47 the nature of the molecular changes and evolutionary forces that lead to hybrid incompatibilities.  
48 What sort of mutations are perfectly functional within species but cause reproductive failure or  
49 death in hybrids? Do such mutations accumulate within species by neutral processes or are they  
50 positively selected, perhaps providing an ecological advantage or resolving an intragenomic  
51 conflict? Addressing the first of these questions is most straightforward in systems with well-  
52 developed genetic tools that facilitate positional cloning, which explains why most progress has  
53 been made in traditional models like *Drosophila*, *Arabidopsis*, and rice. However, insight into the  
54 evolutionary forces acting on hybrid incompatibilities during the speciation process requires a  
55 focus on young species pairs with natural populations.

56 Over the past two decades, genetic dissection of diverse incompatibilities has provided  
57 some hints about their evolutionary origins (reviewed in [4-7]). Often, hybrid incompatibility  
58 genes show molecular signatures of positive selection [8-13], and there is suggestive evidence  
59 that incompatibility alleles can arise through ecological adaptation [14-16] or recurrent bouts of  
60 intragenomic conflict [11, 17-19]. On the other hand, there is also evidence from a handful of  
61 cases, all involving gene duplicates, that the evolution of hybrid dysfunction need not involve  
62 natural selection [20-22].

63 The idea that gene duplication might play a key role in hybrid incompatibilities was initially  
64 proposed by Muller as a variant of his original model (1942). He explained how gene duplication,  
65 followed by degenerative mutations and divergent copy loss, could lead to a difference in gene  
66 position between species with missing (or inactive) copies acting as recessive incompatibility

67 alleles [3]. This same scenario was emphasized later as an explanation for defects in pollen  
68 development between subspecies of Asian cultivated rice, *Oryza sativa* [23], and more recently,  
69 as a general mechanism of hybrid breakdown via neutral processes [24, 25]. There have now  
70 been three empirical demonstrations of gene transposition giving rise to interspecific hybrid male  
71 sterility; one case involves *Drosophila melanogaster*-*D. simulans* hybrids [26] and the other two  
72 arise from crosses between *O. sativa* and wild species [21, 22]. Gene duplication/transposition  
73 also causes lethal and sterile combinations that segregate within *Arabidopsis thaliana* [27, 28]  
74 and *O. sativa* [20]. However, it is not yet clear whether divergent resolution of gene duplicates  
75 contributes to hybrid incompatibilities between wild species in the early stages of divergence.  
76 Only by identifying examples in young species pairs, particularly those with sympatric populations  
77 and still connected by some degree of gene flow, will it be possible to evaluate the contribution  
78 of such loci to speciation.

79         In this study we investigate the molecular genetic basis of hybrid seedling lethality  
80 between two closely related species of yellow monkeyflower, *Mimulus guttatus* and *M. nasutus*.  
81 These recently diverged species (200-500kya; [29]) co-occur throughout much of their shared  
82 range in western North America, where reproductive isolation between sympatric populations  
83 occurs through a number of prezygotic [30-33] and postzygotic barriers [34-40]. Despite  
84 substantial reproductive isolation, patterns of shared variation across their genomes indicate  
85 historical and ongoing gene flow between the two species [29, 31, 41]. Here we focus on  
86 sympatric populations of *M. guttatus* and *M. nasutus* located at Don Pedro Reservoir (DPR) in  
87 central California, where both species coexist within centimeters of one another. Species at DPR  
88 are strongly isolated by divergence in flowering time and mating system [33]; nevertheless,

89 studies have shown low levels of hybridization [33] and a clear signal of introgression [29]. Using  
90 high-resolution genetic mapping and genome-wide expression analyses we identify a duplicate  
91 gene pair as the cause of *Mimulus* hybrid lethality. As the first case of hybrid incompatibility genes  
92 identified between naturally hybridizing species, this study opens the door to direct  
93 investigations of their evolutionary dynamics and contribution to reproductive isolation.

94

## 95 **Results**

### 96 **Hybrid lethality is caused by a two-locus incompatibility**

97 Hybrid lethality occurs in the hybrid progeny DPRG102 and DPRN104 and is easily  
98 characterized by seedlings that completely lack chlorophyll (white seedlings, see Fig S1). As a first  
99 step toward investigating the genetic basis of hybrid lethality between inbred lines of *M. guttatus*  
100 (DPRG102) and *M. nasutus* (DPRN104) from the sympatric DPR site, we examined phenotypic  
101 ratios of white and green seedlings among their selfed progeny and reciprocal F1 and F2 hybrids  
102 (Fig S1, Table S1). Although we never observed white seedlings in the selfed progeny of parental  
103 lines or in F1 hybrids, we discovered that roughly 1/16 of F2 hybrid seedlings were white  
104 (maternal parent listed first: DPRG102xDPRN104,  $N=516$ , 7.36% white seedlings;  
105 DPRN104xDPRG102,  $N=661$ , 5.75% white seedlings). Segregation of white seedlings in reciprocal  
106 F2 hybrids suggests a nuclear, rather than cyto-nuclear, genetic incompatibility. Chi-squared tests  
107 rejected several genetic models that could potentially explain the observed phenotypic ratios,  
108 but could not reject a two-locus model involving only recessive alleles in either F2 population, or  
109 when their ratios were combined (Table S1). These results suggest that hybrid lethality between

110 sympatric *M. guttatus* and *M. nasutus* is caused by a two-locus, recessive-recessive hybrid  
111 incompatibility.

112 To genetically map *Mimulus* hybrid lethality, we performed two rounds of bulked  
113 segregant analysis (BSA). In the first round, we pooled DNA from green and white F2 seedlings  
114 into eight separate tubes (six individuals per pool, four replicates each for green and white).  
115 Because incompatibility alleles act recessively, our expectation was that pooled white seedlings  
116 should be homozygous (for either DPRG102 or DPRN104 alleles) at markers linked to hybrid  
117 lethality loci, whereas green seedlings should segregate 1:2:1 (for DPRG102 homozygotes:  
118 heterozygotes: DPRN104 homozygotes). Of the 126 size-polymorphic markers (spanning much of  
119 the *Mimulus* genome) that we used for genotyping, four showed an association with seedling  
120 phenotype: the four tubes with white seedlings carried only (or mostly) DPRN104 alleles, whereas  
121 green seedlings carried both parental alleles. All four markers map to a region of roughly 40 cM  
122 on linkage group 14 (inferred by marker position in Fishman et al. 2014), which we named *hybrid*  
123 *lethal 14 (hl14)*.

124 To identify the partner locus, we performed a second round of BSA controlling for  
125 genotype at *hl14*. We generated 60 F3 families by self-fertilizing green F2 hybrids that were  
126 homozygous for DPRN104 alleles at *hl14* (determined by genotyping flanking markers); these F3  
127 families segregated green and white seedlings in ratios of either 3:1 or 1:0. We reasoned that if  
128 hybrid lethality is caused by *hl14* and a single interacting locus, white F3 hybrids should be  
129 homozygous for DPRG102 alleles at the partner, whereas green F3 families that do not segregate  
130 white seedlings should be homozygous for DPRN104 alleles. Based on this logic, we formed two  
131 separate pools of DNA from F3 hybrids: one with 34 white seedlings and one with 26 green

132 seedlings from non-segregating families. Note that each F3 seedling was derived from a different  
133 family (i.e., from a unique F2 maternal parent) so that at markers unlinked to hybrid lethality,  
134 both pools should carry each of the two parental alleles at ~50% frequency. For the two pools,  
135 we performed whole genome sequencing, generated a genome-wide SNP dataset, and calculated  
136 average allele frequency difference in 200-SNP sliding windows (100-SNP overlap between  
137 windows). Using this approach, we discovered that the top 5% most divergent windows were  
138 located in contiguous windows along the distal end of chromosome 13 (Fig S2), which we named  
139 *hybrid lethal 13 (hl13)*.

140 To fine-map *hl13* and *hl14*, we generated a large DPRN104 x DPRG102 F2 mapping  
141 population, oversampling white seedlings to roughly equalize frequencies of the two phenotypes  
142 (white = 44%, green = 56%,  $N = 2,652$ ). Each F2 individual was genotyped at markers believed to  
143 flank the hybrid lethality loci: M208 and M236 at *hl13*, and M241 and M132 *hl14*. As expected,  
144 nearly all white seedlings were homozygous for DPRG102 alleles at the *hl13*-linked markers and  
145 homozygous for DPRN104 alleles at the *hl14* markers (92%,  $N = 1174$ ), whereas green seedlings  
146 never carried this genotype ( $N = 1478$ ) (Fig 1). Because we later discovered that both M208 and  
147 M236 are proximal to *hl13*, an additional 2,182 F2 hybrids were screened with a more distal  
148 marker (either M263 or M255). We genotyped informative recombinants at additional size-  
149 polymorphic and SNP-based markers designed in each interval. Although white seedlings must  
150 be destructively sampled for DNA, green seedlings were allowed to grow into adult plants so that  
151 informative recombinants could be self-fertilized and phenotyped via progeny testing. In this  
152 way, we determined if green F2 hybrids were heterozygous for *hl13* and/or *hl14* (versus  
153 homozygous for compatible alleles). Using this strategy, we mapped the *hl13* locus to a 72.2 kb-

154 region at the distal end of chromosome 13 that contains 24 genes (Fig 2A). At the same time, we  
155 mapped the *hl14* locus to a 51.6 kb-region of chromosome 14 that contains six genes, as well as  
156 a gap of unknown size in the *M. guttatus* IM62 reference genome (Fig 2B). For each *hl13* and *hl14*  
157 candidate gene, we identified its top blast hit(s) in *Arabidopsis thaliana*, gene ontology terms,  
158 known mutant phenotypes, and predicted functions (Table S2).

159

### 160 **Gene duplicates map to hybrid lethality loci**

161         Among several strong functional candidates for *hl13* is *Migut.M02023*, a homolog of  
162 *pTAC14* (*PLASTID TRANSCRIPTIONALLY ACTIVE CHROMOSOME 14*). In *A. thaliana*, *pTAC14* is  
163 essential for proper chloroplast development and mutants show a chlorotic lethal phenotype  
164 [42] that appears identical to DPRG102xDPRN104 F2 hybrid lethality. In addition to  
165 *Migut.M02023* on chromosome 13, we also identified a highly similar and slightly truncated  
166 protein homolog of *pTAC14* (99.1% amino acid similarity along length of truncated homolog),  
167 *Migut.O00467*, located on an unmapped scaffold of the IM62 *M. guttatus* reference genome  
168 (v2.0 scaffold\_193). To investigate the possibility that this additional copy of *Mg.pTAC14* resides  
169 on chromosome 14, we turned to several large-insert IM62 genomic libraries (six fosmid and two  
170 BAC libraries) that were generated and end-sequenced as part of the reference genome assembly  
171 effort [43]. Among these libraries, only a single end-sequence of one fosmid blasts to v2.0  
172 scaffold\_193. Intriguingly, the other end-sequence of this same fosmid blasts to the first exon of  
173 *Migut.N01489*, a gene within the mapped interval of *hl14*. This finding provides evidence that a  
174 second copy of *Mg.pTAC14* is located on chromosome 14 in IM62, despite it being absent from  
175 the current genome assembly. Using PCR, we confirmed that the DPRG102 genome also contains



176 two copies of *pTAC14* (Fig S3). However, despite exhaustive PCR and cloning efforts (using many  
177 different primer combinations), we recovered only one copy of *pTAC14* from DPRN104 genomic  
178 DNA.

179 To determine if *Mimulus pTAC14* duplicates genetically map to DPRG102-DPRN104 hybrid  
180 lethality loci, we obtained a set of 96 DPRG102xDPRN104 F2 hybrids carrying each of the nine  
181 possible two-locus genotypes at *h/13* and *h/14* (10 replicates for each green genotype and 16  
182 replicates of the white seedling genotype, see Fig 3). Using a set of conserved primers spanning  
183 exons 6-8, we PCR-amplified and sequenced *Mimulus pTAC14* from each of these F2 hybrids.  
184 Across this region, 10 SNPs define three distinct haplotypes of *pTAC14*: “G1” and “G2” from  
185 DPRG102 and “N1” DPRN104 (Fig 3). Remarkably, we discovered a perfect association between  
186 *pTAC14* haplotype and *h/13/h/14* genotype: G1 is present in all individuals with DPRG102 alleles  
187 at *h/13*, G2 is in all individuals with DPRG102 alleles at *h/14*, and N1 is in all individuals with  
188 DPRN104 alleles at *h/13*. From this pattern, we infer that both DPRG102 and DPRN104 carry  
189 copies of *pTAC14* at *h/13* (hereafter referred to as *Mg.pTAC14\_1* and *Mn.pTAC14\_1*,  
190 respectively), but that only DPRG102 carries a copy at *h/14* (referred to as *Mg.pTAC14\_2*).

191 To examine sequence similarity among *Mimulus pTAC14* genes, we obtained full-length  
192 genomic sequences from both DPR parents and generated a neighbor-joining tree (Fig 4, Fig S3).  
193 As expected, chromosome 13 copies of *pTAC14* from DPRG102 and IM62 cluster together  
194 (*Mg.pTAC14\_1* and *Migut.M02023*). Likewise, chromosome 14 copies of *pTAC14* from DPRG102  
195 and IM62 cluster together (*Mg.pTAC14\_2* and *Migut.O00467*). However, somewhat  
196 counterintuitively, the DPRN104 copy (*Mn.pTAC14\_1*), which is located on chromosome 13,

197 clusters more closely with *M. guttatus* copies on chromosome 14 than with copies on  
198 chromosome 13 (Fig 4B).

199

### 200 ***Mimulus pTAC14* duplicates are nonfunctional in hybrid lethal seedlings**

201 Consistent with a causal role for *Mimulus pTAC14* duplicates in hybrid lethality, we  
202 discovered several lines of evidence that suggest only one of the two copies is functional in  
203 DPRG102. First, *Mg.pTAC14\_1* (at *h/13*) contains a frameshift mutation in exon 7, which results  
204 in the production of numerous premature stop codons in downstream sequence (Fig 4A, Fig S3).  
205 Second, from each inbred line, we PCR-amplified only a single copy of the gene from leaf cDNA:  
206 *Mg.pTAC14\_2* in DPRG102 and *Mn.pTAC14\_1* in DPRN104. Third, *pTAC14* expression is nearly  
207 absent in white F2 hybrid seedlings, which inherit *h/13* from DPRG102 (containing *Mg.pTAC14\_1*)  
208 and *h/14* from DPRN104 (containing no copy of *pTAC14*). Using qPCR and primers that amplify  
209 both *Mimulus pTAC14* duplicates, we found strong expression in green parental and F2 seedlings,  
210 but not in white F2 seedlings (qPCR on eight additional functional candidates in the *h/13* and *h/14*  
211 intervals showed no association between expression and seedling phenotype; Table S2, Fig S4).  
212 Additionally, we performed RNAseq on DPRG102, DPRN104, green F2, and white F2 seedlings.  
213 Consensus sequences generated from *de novo* assemblies of DPRG102 reads that align to  
214 *Migut.M02023* and/or *Migut.O00467* (high sequence similarity between *pTAC14* duplicates  
215 means that reads align equally well to both copies) correspond to *Mg.pTAC14\_2*; consensus  
216 sequences generated in the same manner from DPRN104 reads correspond to *Mn.pTAC14\_1*.  
217 Moreover, RNAseq SNP variation in green F2 seedlings suggests they express only *Mg.pTAC14\_2*  
218 from DPRG102 and/or *Mn.pTAC14\_1* from DPRN104. In contrast, read coverage of *pTAC14*

219 transcripts in white F2 seedlings is exceptionally low: of the 1,092 genes that are significantly  
220 differentially expressed between white F2 seedlings and green seedlings (DPRG102, DPRN104,  
221 green F2 hybrids), the duplicate copies of *pTAC14* are the two most underexpressed (Fig 5). Taken  
222 together, these results provide strong evidence that *Mimulus* hybrid lethality is caused by  
223 nonfunctional *pTAC14* duplicates: white hybrid seedlings carry unexpressed *Mg.pTAC14\_1* alleles  
224 at *hl13* and are missing *pTAC14* alleles altogether at *hl14*.

225

### 226 **Genome-wide misexpression in hybrid lethal seedlings**

227       Comparison of genome-wide RNAseq patterns among DPRG102, DPRN104, green F2, and  
228 white F2 seedlings provides additional support for disrupted *pTAC14* function as a cause of hybrid  
229 lethality. White F2 seedlings show a strong signature of genome-wide misexpression: of 27,948  
230 annotated genes, 1,092 (3%) are significantly misexpressed in all three pairwise comparisons  
231 between white and green seedlings (Fig 5). Among transcripts that are underexpressed in white  
232 seedlings ( $N = 209$ ), we found a significant enrichment of genes involved in photosynthesis and/or  
233 located within the thylakoid and photosynthetic membranes. Among overexpressed transcripts  
234 ( $N = 883$ ), we observed an enrichment of heat shock proteins and glutathione peroxidase proteins  
235 (Table S3). Furthermore, consistent with disrupted *pTAC14* function, we discovered evidence for  
236 severe misexpression of chloroplast-encoded genes in white seedlings (Fig 6, Fig S5). In *A.*  
237 *thaliana*, knockouts of *pTAC14* disable the PEP (plastid-encoded bacterial type) RNA polymerase,  
238 which leads to reduced transcription of some chloroplast-encoded genes, particularly those  
239 involved in photosynthesis (*e.g.*, photosystem I, photosystem II, and cytochrome b6f), and  
240 increased transcription of others such as the *rpo* genes (Gao et al. 2011). Of 52 putative *Mimulus*

241 chloroplast genes, those involved in photosynthesis, and thus likely to be transcribed by PEP RNA  
242 polymerase, were often significantly underexpressed in white F2 seedlings. In contrast, homologs  
243 of *A. thaliana rpo* genes were significantly overexpressed. Several additional putative chloroplast  
244 genes (*e.g.*, ATP synthase, NADH Dehydrogenase, ribosomal proteins) that are likely transcribed  
245 by both PEP and the nuclear-encoded phage-type (NEP) RNA polymerase [44, 45] were also  
246 significantly misexpressed (both up- and downregulated) in white seedlings. Taken together,  
247 these patterns of gene misexpression in *Mimulus* F2 white seedlings, which show a remarkable  
248 similarity to patterns observed in *A. thaliana pTAC14* knockouts [42], provide strong evidence for  
249 a causal role of *pTAC14* duplicates in *Mimulus* hybrid lethality.

250

## 251 **Discussion**

252 Identifying the molecular genetic basis of hybrid incompatibilities between recently  
253 diverged, wild species is a critical first step toward understanding their evolutionary origins and  
254 role in speciation. We have shown that duplicate copies of *Mimulus pTAC14*, a gene critical for  
255 chloroplast development in *A. thaliana* [42], causes hybrid lethality between sympatric *M.*  
256 *guttatus* and *M. nasutus* at the DPR site. We fine-mapped hybrid lethality to *hl13* and *hl14*, two  
257 small nuclear genomic regions on chromosomes 13 and 14. In DPRG102 (*M. guttatus*), *pTAC14* is  
258 present in each of these genomic intervals, but only the *hl14* copy is expressed. In DPRN104 (*M.*  
259 *nasutus*), *pTAC14* is present only in the *hl13* interval, consistent with either of two possibilities:  
260 the *hl13* copy is ancestral and this line lacks the duplication, or a large deletion has removed all  
261 trace of the gene from *hl14*. As a consequence of divergent resolution of these duplicate genes,  
262 F2 hybrids that are homozygous for DPRG102 alleles at *hl13* and homozygous for DPRN102 alleles

263 at *hl14* contain no functional copy of *Mimulus pTAC14*. These hybrids fail to produce chlorophyll  
264 and die in the cotyledon stage of development, remarkably similar to what is observed in *pTAC14*  
265 knockouts in *A. thaliana* [42]. To our knowledge, this is the first pair of hybrid incompatibility  
266 genes identified between naturally hybridizing species.

267         Using complementary genetic mapping and functional genomics approaches, our study  
268 provides strong evidence that nonfunctional *Mimulus pTAC14* is the cause of DPRG102-DPRN104  
269 hybrid lethality. In *A. thaliana*, *pTAC14* is one of several nuclear-encoded proteins that are critical  
270 components of the PEP RNA polymerase. As the only RNA polymerase responsible for  
271 transcribing key plastid-encoded photosynthesis genes (photosystem I, photosystem II,  
272 cytochrome b6f), PEP is an essential enzyme in plants [44, 46]. Knockouts that disrupt or  
273 inactivate PEP activity (such as *pTAC14*) share several common phenotypes, including the  
274 complete lack of photosynthesis, down-regulation of plastid-encoded photosynthesis genes, and  
275 up-regulation of plastid-encoded PEP subunits (e.g., *rpo* genes) [42, 45-50]. The transcriptional  
276 profile of putative chloroplast genes in white DPRN104-DPRG102 F2 seedlings bears a striking  
277 resemblance to that of *A. thaliana* mutants that disable PEP, particularly the down-regulation of  
278 photosynthetic genes and up-regulation of *rpo* genes. This fact, combined with our finding that  
279 *pTAC14* is the only PEP-associated protein that maps to *hl13* or *hl14*, provides strong evidence  
280 that hybrid lethality is the product of PEP-inactivation

281         But what causes the lack of *pTAC14* expression in white hybrid seedlings? In *M. nasutus*  
282 (DPRN104), because *pTAC14* is missing entirely from the *hl14* interval, the *hl13* copy  
283 (*Mn.pTAC14\_1*) is the only one expressed. In *M. guttatus* (DPRG102), the situation is less clear.  
284 Although both copies (*Mg.pTAC14\_1* at *hl13* and *Mg.pTAC14\_2* at *hl14*) are present and highly

285 similar in exons (Fig S3), our qPCR and RNAseq experiments demonstrate that only one of them  
286 – *Mg.pTAC14\_2* – is expressed. Further work will be required to determine the molecular nature  
287 of this change in gene expression. The most obvious possibility is that non-sense mediated decay  
288 has efficiently targeted *Mg.pTAC14\_1*, which carries a series of premature stop codons. Another  
289 possibility, is that a *cis*-regulatory mutation disrupts *Mg.pTAC14\_1* transcription in DPRG102.  
290 Alternatively, expression might be prevented by the epigenetic silencing of one duplicate by the  
291 other, as was recently shown for sterile and lethal combinations segregating within *A. thaliana*  
292 [28, 51]. Whatever its cause, disrupted expression is not the only problem with DPRG102  
293 *Mg.pTAC14\_1*; this gene copy also carries a 1-bp insertion that, if transcribed, would result in a  
294 truncated, and potentially nonfunctional, protein. We do not yet know which of these two  
295 functional changes to DPRG102 *Mg.pTAC14\_1* arose first.

296 The evolution of hybrid lethality in this system thus appears entirely consistent with a  
297 scenario of duplication and neutral non-functionalization within *M. guttatus*. Given the ubiquity  
298 of gene duplications in plant and animal genomes, divergent resolution of paralogs due to  
299 degenerative mutation and genetic drift has been proposed as a major source of hybrid  
300 incompatibilities [24, 25, 52]. Although initially redundant duplicate genes might sometimes  
301 evolve new or partial functions favored by selection [53], our study and others suggest that  
302 duplicates involved in hybrid incompatibilities are more often subject to mutations that disable  
303 function in one copy. Within *A. thaliana* and between closely related *Oryza* species, divergent  
304 resolution of duplicates has occurred through nonsense mutations [20, 22] and disruptions to  
305 expression [21, 27, 51]. In a more distantly related species pair of *Drosophila*, hybrid sterility is  
306 caused by a gene transposition, with degenerative mutations having presumably removed any

307 remnant of the duplication that likely preceded its evolution [26]. Remarkably, then, to explain  
308 the evolution of hybrid dysfunction in *Mimulus* and several other diverse systems, there is no  
309 need to invoke processes beyond mutation and genetic drift.

310 In addition to showing that *Mimulus* hybrid lethality is due to nonfunctional *pTAC14*, our  
311 analyses have begun to provide some insight into the duplication history of this gene. As might  
312 be expected, within *M. guttatus* (DPRG102 and IM62), *pTAC14* copies on chromosome 13 are  
313 most related and *pTAC14* copies on chromosome 14 are most related (Fig 4). However,  
314 somewhat counterintuitively, *pTAC14* from DPRN104, which is located on chromosome 13, is  
315 most closely related to the *M. guttatus* copies on chromosome 14. We interpret this finding,  
316 along with the fact that we find no trace of *pTAC14\_2* at *hl14* in DPRN104, as evidence that  
317 *Mimulus pTAC14\_1* on chromosome 13 is the ancestral copy. Under this scenario, both the  
318 duplicate copy on chromosome 14 (*Mg.pTAC14\_2*) and the *M. nasutus* copy on chromosome 13  
319 (*Mn.pTAC14\_1*) would have arisen from a similar genetic variant (Fig 7). Standing genetic  
320 variation within and between populations of *M. guttatus* is high [29, 54-56, 57 ] so it is likely that  
321 ancestral populations carried multiple variants of *pTAC14\_1*. Both the duplicated copy in *M.*  
322 *guttatus* (*Mg.pTAC14\_2*) and the ancestral copy in the selfing *M. nasutus* (*Mn.pTAC14\_1*) would  
323 be expected to carry only a small subset of ancestral variation. Unfortunately, we have not yet  
324 been able to assess molecular patterns of *Mimulus pTAC14* variation in a wider sample of *M.*  
325 *guttatus* and *M. nasutus*. Although whole genome resequence data are available from a number  
326 of lines [29, 54, 57], short-read sequences of *Mimulus pTAC14* align equally well to both  
327 annotated copies in the IM62 reference genome (*Migut.M02023* and *Migut.O00467*). Once  
328 *Mimulus pTAC14* is sequenced from a broader sample of individuals, we speculate that

329 *Mn.pTAC14\_1* from *M. nasutus* and *Mg.pTAC14\_2* from *M. guttatus* will cluster as distinct  
330 monophyletic groups nested within the greater diversity of sequences present at the ancestral  
331 *Mg.pTAC14\_1* from *M. guttatus*. Interestingly, white seedlings are often observed segregating at  
332 low frequencies within *M. guttatus* populations, which manifest as epistatic inbreeding  
333 depression [58, 59] that may be due to divergent resolution of duplicate genes similar to the one  
334 characterized here. Indeed, variation for functional and non-functional *pTAC14* variations exists  
335 at both *hl13* and *hl14* in *M. guttatus*, indicating that this duplication may present such a case  
336 (Zuellig and Sweigart, unpublished results).

337         Our study provides the first detailed study of hybrid incompatibility genes from naturally  
338 hybridizing species and contributes to a growing body of literature that shows hybrid  
339 incompatibilities can result from neutral evolutionary change within species. Going forward, it  
340 will be important to address whether these barriers can persist in the face of ongoing gene flow.  
341 Theoretical treatments of this question have consistently concluded that the maintenance of  
342 hybrid incompatibility alleles between hybridizing populations relies heavily on a selective  
343 advantage within species [60-64]. If so, neutrally evolving hybrid incompatibility alleles might be  
344 precluded from affecting reproductive isolation in any more than a transient fashion, with gene  
345 flow temporarily constrained until the hybrid incompatibility degrades with time. Nevertheless,  
346 other factors such as strong linkage to selected alleles (e.g., [16]) and constraints on gene dosage  
347 (e.g., [65]) may play an important role in such incompatibilities. By showing that the duplication  
348 of *pTAC14* underlies hybrid lethality among sympatric *Mimulus* species, we now have a natural  
349 system in place to test broader questions regarding the evolutionary significance of neutral  
350 processes on speciation.



351

## 352 **Materials and Methods**

### 353 ***Mimulus* lines and genetic crosses**

354 We generated inbred lines of *M. guttatus* and *M. nasutus* derived from wild individuals  
355 collected from Don Pedro Reservoir (DPR) in central California [33]. Wild-collected seed was sown  
356 on moist Fafard 3-B potting soil in 2.5" pots, cold-stratified in the dark at 4C for two weeks, and  
357 moved the UGA greenhouses to germinate under 16 hour days at 23°C (growth conditions were  
358 constant for all experiment, though RNAseq experiment took place in growth chamber). Upon  
359 germination, a single seedling was transplanted to its own 2.5" pot, allowed to flower, and self-  
360 fertilized. After three generations of selfing with single-seed descent, each line (DPRG102: *M.*  
361 *guttatus*; DPRN104: *M. nasutus*) was intercrossed to generate reciprocal F1 and F2 hybrids  
362 (maternal parent always listed first in crosses).

363

### 364 **Molecular analyses and whole genome sequencing**

365 DNA was extracted from seedlings and adult leaf tissue using a standard CTAB-chloroform  
366 protocol [66] modified for use in a 96-well format. Genotyping was performed using a  
367 combination of exon-primed intron-spanning size polymorphic markers containing 5' fluorescent  
368 tags (6-FAM or HEX) and SNP-containing gene fragments that were analyzed through Sanger  
369 sequencing. We designed size-polymorphic and SNP markers from polymorphisms observed in  
370 whole genome re-sequence data of multiple lines of *M. guttatus* and *M. nasutus* [29, 67, 68]  
371 and confirmed polymorphisms by genotyping parental lines used in our study. A standard  
372 touchdown PCR protocol was used in all amplifications and Sanger sequencing reactions were

373 prepared using BigDye v3.1 mastermix (Applied Biosystems, Foster City, USA). Genotyping and  
374 Sanger sequencing reactions were run on an ABI3730XL automated DNA sequencer at the  
375 Georgia Genomics Facility and analyzed using GENEMARKER [69] and Sequencher (Gene Codes  
376 Corporation, Ann Arbor, USA) software, respectively.

377 For whole genome sequencing of bulked segregants, we generated equimolar amounts  
378 of DNA from green (N=26 ) and white hybrid seedlings (N=34). Green and white DNA was pooled  
379 separately and sent to the Duke Center for Genomic and Computational Biology, where Illumina  
380 libraries with unique barcodes were prepared and sequenced using the Illumina Hi-seq platform  
381 (100bp single-end reads). Reads from both pools were aligned to the *M. guttatus* (IM62)  
382 reference genome (<https://phytozome.jgi.doe.gov>), along with previously generated whole  
383 genome re-sequence data for DPRN104 [29]. Reads were aligned using Burrows-Wheeler Aligner  
384 (bwa, [70]) with a minimum alignment quality threshold of Q29 (filtering done with samtools,  
385 [71]). We identified 235,922 SNPs that differentiated the IM62 reference genome from DPRN104  
386 using the samtools mpileup function, which provided a list of SNPs that differentiate these two  
387 lineages. We used the samtools mpileup function to estimate the frequency of each SNP  
388 ('alternate allele frequency') within white and green BSA pools. Since SNPs were not based on  
389 differences between DPRN104 and DPRG102, our analysis assumes that *M. guttatus* lines IM62  
390 and DPRG102 (which is not sequenced) share a common set of SNPs.

391

### 392 **qPCR and RNA sequencing**

393 We performed quantitative PCR on a subset of strong candidate genes within *h/13* and  
394 *h/14* (9 genes total, Table S2), comparing expression patterns in seedlings from DPRG102,

395 DPRN104, green F2s, and white F2s. We extracted RNA from pools of 10 seedlings for each  
396 genotypic class using a Zymo MicroRNA Kit (Zymo Research, Irvine, USA) followed by cDNA  
397 synthesis with GOscript Reverse Transcriptase (Promega, Madison, USA). We designed exon-  
398 specific primers to amplify fragments of each gene (Table S4), amplified fragments using standard  
399 touchdown PCR, and visualized gene fragments on a 1% agarose gel.

400 We performed an RNAseq experiment to compare genome-wide expression profiles  
401 between white and green seedlings. We used lines of DPRG102 and DPRN104 that had been  
402 inbred for 5 generations and their green and white F2 progeny, which resulted in three classes of  
403 green seedlings (DPRG102, DPRN104, and green F2s) and a single class of white seedlings (white  
404 F2s). Seedlings with fully expanded cotyledons began to emerge within 3 days and continued to  
405 emerge for a week thereafter. We collected pools of 10 seedlings from each biological class  
406 directly into 2mL Eppendorf tubes filled with liquid nitrogen. We then extracted RNA from these  
407 pools using the Zymo Quick-RNA microprep kit (Zymo Research, Irvine, USA) and estimated RNA  
408 concentration using a qubit fluorometer (Life Technologies, Paisley, UK). High quality RNA was  
409 subsequently submitted to the Duke Center for Genomic and Computational Biology, where Kapa  
410 Stranded mRNA-Seq libraries (Kapa Biosystems, Wilmington, USA) were prepared and samples  
411 were sequenced across a single lane of Illumina Hiseq 4000 with single-end 50 bp reads. In total,  
412 our analysis involved three replicates each of DPRG102 and DPR104 green seedlings, five  
413 replicates of green F2 seedlings, and six replicates of white F2 seedlings, where each replicate  
414 was a pool of 10 seedlings.

415 We utilized the cufflinks pipeline [72] to assess patterns of differential expression among  
416 the four genotypic classes (DPRG102, DPRN104, green F2s, and white F2s). We aligned trimmed

417 and filtered reads ( $Q > 20$ ) to the *M. guttatus* IM62 reference genome in TopHat2 [73], which  
418 resulted in an average of 19 million reads aligned per biological replicate. We then assembled  
419 transcriptomes in cufflinks, using the IM62 reference transcriptome as a guide. We used  
420 ‘cuffnorm’ to normalize transcript abundance for each genotypic class and ‘cuffdiff’ to calculate  
421 differential expression for all pairwise comparisons. For data management and sorting, we used  
422 Microsoft excel, the R statistical package [74], and the R package CummeRbund [72]. Gene  
423 ontology (GO) enrichment analyses were carried out for particular subsets of data that exhibited  
424 patterns of differential expression between white and green seedlings. To perform these  
425 analyses, we used GStat [75] and GO::TermFinder [76] implemented in the Phytomine user  
426 interface (<https://phytozome.jgi.doe.gov>). For GO term analyses, we used all annotated genes in  
427 the v2.0 IM62 *M. guttatus* reference assembly to serve as the background population and used  
428 a Bonferroni cutoff value of 0.05 to test for significant GO term enrichment in our subset of  
429 differentially expressed genes. For our analysis of chloroplast-encoded genes, we generated a list  
430 of putative chloroplast genes, since no chloroplast genome assembly is currently available for *M.*  
431 *guttatus*. We generated this set by first downloading a list of 135 genes present in the chloroplast  
432 genome in *A. thaliana* from the TAIR database ([www.arabidopsis.org](http://www.arabidopsis.org)). We used this list to  
433 identify *M. guttatus* homologs in the Phytomine database (<https://phytozome.jgi.doe.gov>). This  
434 approach yielded a set of 52 putative *Mimulus* chloroplast genes that are currently included (and,  
435 presumably, misassembled) in the nuclear genome (no homologs were identified for the other  
436 83 genes used in our search). A substantial fraction of these genes (69%) occur along  
437 chromosome 4 from positions 6,719,000-7,985,375, which contains 183 genes total.

438

## 439 **Gene sequencing and phylogenetic analyses**

440 To obtain full-length *pTAC14* sequences from DPRG102 and DPRN104, we amplified both  
441 genomic and cDNA using primers designed within conserved exonic sequence. PCR fragments  
442 were amplified using Phusion High-Fidelity DNA Polymerase (New England Biolabs, Ipswich, USA)  
443 and either directly sequenced or sequenced after cloning into the TOPO TA Vector (Thermo  
444 Fisher, Carlsbad, USA). Additionally, we extracted full-length transcript sequences from RNAseq  
445 data by performing *de novo* assemblies on reads that mapped to candidate genes using the  
446 Geneious Assembler (Biomatters, Newark, USA). When reads mapped to duplicated genes, they  
447 were combined into a single *de novo* assembly and 95% confidence consensus sequences were  
448 constructed. Using PHYML [77], we constructed a neighbor-joining tree for *pTAC14* using 4,319  
449 bp of genomic sequence (excluding 5' and 3' UTRs and insertions/deletions coded as single  
450 variants) with branch support determined with 1000 bootstraps. For the tree presented in Fig 4b,  
451 we used the general time-reversible model with four substitution rate categories and allowed  
452 the program to estimate the proportion of variable sites and the gamma distribution parameter  
453 (varying these parameters produced identical consensus trees).

454

## 455 **Acknowledgments**

456 We thank Noland Martin and John Willis for first identifying white seedlings at Don Pedro  
457 Reservoir and encouraging us to study them. We thank Amanda Kenney for her help with BSA  
458 experiments and intellectual contributions. John Willis, Nick Arthur, Rachel Kerwin, Nick Batora,  
459 and Sam Mantel provided thoughtful comments, which significantly improved the quality of our  
460 manuscript.

461

## 462 **References**

- 463 1. Bateson W. Heredity and variation in modern lights. Darwin and modern science.  
464 1909;85:101.
- 465 2. Dobzhansky T, Dobzhansky TG. Genetics and the Origin of Species: Columbia University  
466 Press; 1937.
- 467 3. Muller HJ, editor Isolating mechanisms, evolution and temperature. Biol Symp; 1942.
- 468 4. Fishman L, Sweigart AL. When two rights make a wrong: evolutionary genetics of plant  
469 hybrid incompatibilities. *Annual review of plant biology*. in press.
- 470 5. Maheshwari S, Barbash DA. The Genetics of Hybrid Incompatibilities. Annual Review of  
471 Genetics. 2011;45(1):331-55. doi: 10.1146/annurev-genet-110410-132514. PubMed PMID:  
472 21910629.
- 473 6. Presgraves DC. The molecular evolutionary basis of species formation. Nature Reviews  
474 Genetics. 2010;11(3):175-80.
- 475 7. Sweigart AL, Willis JH. Molecular evolution and genetics of postzygotic reproductive  
476 isolation in plants. F1000 biology reports. 2012;4:23.
- 477 8. Brideau NJ, Flores HA, Wang J, Maheshwari S, Wang X, Barbash DA. Two Dobzhansky-  
478 Muller Genes Interact to Cause Hybrid Lethality in *Drosophila*. Science.  
479 2006;314(5803):1292-5. doi: 10.1126/science.1133953.
- 480 9. Maheshwari S, Wang J, Barbash DA. Recurrent Positive Selection of the *Drosophila* Hybrid  
481 Incompatibility Gene Hmr. Molecular Biology and Evolution. 2008;25(11):2421-30. doi:  
482 10.1093/molbev/msn190.

- 483 10. Oliver PL, Goodstadt L, Bayes JJ, Birtle Z, Roach KC, Phadnis N, et al. Accelerated evolution  
484 of the Prdm9 speciation gene across diverse metazoan taxa. *PLoS Genet.* 2009;5(12):e1000753.
- 485 11. Phadnis N, Orr HA. A single gene causes both male sterility and segregation distortion in  
486 *Drosophila* hybrids. *science.* 2009;323(5912):376-9.
- 487 12. Presgraves DC, Balagopalan L, Abmayr SM, Orr HA. Adaptive evolution drives divergence  
488 of a hybrid inviability gene between two species of *Drosophila*. *Nature.* 2003;423(6941):715-9.
- 489 13. Tang S, Presgraves DC. Evolution of the *Drosophila* nuclear pore complex results in  
490 multiple hybrid incompatibilities. *Science.* 2009;323(5915):779-82.
- 491 14. Chen C, Chen H, Lin Y-S, Shen J-B, Shan J-X, Qi P, et al. A two-locus interaction causes  
492 interspecific hybrid weakness in rice. *Nature communications.* 2014;5:3357.
- 493 15. Sicard A, Kappel C, Josephs EB, Lee YW, Marona C, Stinchcombe JR, et al. Divergent sorting  
494 of a balanced ancestral polymorphism underlies the establishment of gene-flow barriers in  
495 *Capsella*. *Nature Communications.* 2015;6:7960. doi: 10.1038/ncomms8960  
496 <http://www.nature.com/articles/ncomms8960-supplementary-information>.
- 497 16. Wright KM, Lloyd D, Lowry DB, Macnair MR, Willis JH. Indirect evolution of hybrid lethality  
498 due to linkage with selected locus in *Mimulus guttatus*. *PLoS Biol.* 2013;11(2):e1001497.
- 499 17. Case AL, Finseth FR, Barr CM, Fishman L. Selfish evolution of cytonuclear hybrid  
500 incompatibility in *Mimulus*. *Proceedings of the Royal Society B: Biological*  
501 *Sciences.* 2016;283(1838).
- 502 18. Tao Y, Hartl DL, Laurie CC. Sex-ratio segregation distortion associated with reproductive  
503 isolation in *Drosophila*. *Proceedings of the National Academy of Sciences.* 2001;98(23):13183-8.  
504 doi: 10.1073/pnas.231478798.

- 505 19. Zhang L, Sun T, Woldehellassie F, Xiao H, Tao Y. Sex Ratio Meiotic Drive as a Plausible  
506 Evolutionary Mechanism for Hybrid Male Sterility. *PLOS Genetics*. 2015;11(3):e1005073. doi:  
507 10.1371/journal.pgen.1005073.
- 508 20. Mizuta Y, Harushima Y, Kurata N. Rice pollen hybrid incompatibility caused by reciprocal  
509 gene loss of duplicated genes. *Proceedings of the National Academy of Sciences*.  
510 2010;107(47):20417-22. doi: 10.1073/pnas.1003124107.
- 511 21. Nguyen GN, Yamagata Y, Shigematsu Y, Watanabe M, Miyazaki Y, Doi K, et al. Duplication  
512 and Loss of Function of Genes Encoding RNA Polymerase III Subunit C4 Causes Hybrid  
513 Incompatibility in Rice. *G3: Genes|Genomes|Genetics*. 2017;7(8):2565.
- 514 22. Yamagata Y, Yamamoto E, Aya K, Win KT, Doi K, Sobrizal, et al. Mitochondrial gene in the  
515 nuclear genome induces reproductive barrier in rice. *Proceedings of the National Academy of*  
516 *Sciences*. 2010;107(4):1494-9. doi: 10.1073/pnas.0908283107.
- 517 23. Oka H-I. Analysis of Genes Controlling F(1) Sterility in Rice by the Use of Isogenic Lines.  
518 *Genetics*. 1974;77(3):521-34. PubMed PMID: PMC1213144.
- 519 24. Lynch M, Force AG. The Origin of Interspecific Genomic Incompatibility via Gene  
520 Duplication. *The American Naturalist*. 2000;156(6):590-605. doi: doi:10.1086/316992.
- 521 25. Werth CR, Windham MD. A Model for Divergent, Allopatric Speciation of Polyploid  
522 Pteridophytes Resulting from Silencing of Duplicate-Gene Expression. *The American Naturalist*.  
523 1991;137(4):515-26. doi: doi:10.1086/285180.
- 524 26. Masly JP, Jones CD, Noor MA, Locke J, Orr HA. Gene transposition as a cause of hybrid  
525 sterility in *Drosophila*. *Science*. 2006;313(5792):1448-50.



- 526 27. Bikard D, Patel D, Le Metté C, Giorgi V, Camilleri C, Bennett MJ, et al. Divergent Evolution  
527 of Duplicate Genes Leads to Genetic Incompatibilities Within *A. thaliana*. *Science*.  
528 2009;323(5914):623-6. doi: 10.1126/science.1165917.
- 529 28. Durand S, Bouché N, Strand EP, Loudet O, Camilleri C. Rapid establishment of genetic  
530 incompatibility through natural epigenetic variation. *Current Biology*. 2012;22(4):326-31.
- 531 29. Brandvain Y, Kenney AM, Fligel L, Coop G, Sweigart AL. Speciation and introgression  
532 between *Mimulus nasutus* and *Mimulus guttatus*. *PLoS Genet*. 2014;10(6):e1004410.
- 533 30. Diaz A, Macnair M. Pollen tube competition as a mechanism of prezygotic reproductive  
534 isolation between *Mimulus nasutus* and its presumed progenitor *M. guttatus*. *New Phytologist*.  
535 1999;144(3):471-8.
- 536 31. Kenney AM, Sweigart AL. Reproductive isolation and introgression between sympatric  
537 *Mimulus* species. *Molecular ecology*. 2016;25(11):2499-517.
- 538 32. Kiang Y, Hamrick J. Reproductive isolation in the *Mimulus guttatus* *M. nasutus* complex.  
539 *American Midland Naturalist*. 1978:269-76.
- 540 33. Martin NH, Willis JH. Ecological divergence associated with mating system causes nearly  
541 complete reproductive isolation between sympatric *Mimulus* species. *Evolution*. 2007;61(1):68-  
542 82.
- 543 34. Case AL, Willis JH. Hybrid male sterility in *Mimulus* (Phrymaceae) is associated with a  
544 geographically restricted mitochondrial rearrangement. *Evolution*. 2008;62(5):1026-39.
- 545 35. Fishman L, Willis JH. A cytonuclear incompatibility causes anther sterility in *Mimulus*  
546 hybrids. *Evolution*. 2006;60(7):1372-81.

- 547 36. Kiang Y, Libby W. Maintenance of a lethal in a natural population of *Mimulus guttatus*.  
548 *The American Naturalist*. 1972;106(949):351-67.
- 549 37. Martin NH, Willis JH. Geographical variation in postzygotic isolation and its genetic basis  
550 within and between two *Mimulus* species. *Philosophical Transactions of the Royal Society of*  
551 *London B: Biological Sciences*. 2010;365(1552):2469-78.
- 552 38. Sweigart AL, Fishman L, Willis JH. A Simple Genetic Incompatibility Causes Hybrid Male  
553 Sterility in *Mimulus*. *Genetics*. 2006;172(4):2465-79. doi: 10.1534/genetics.105.053686.
- 554 39. Sweigart AL, Flagel LE. Evidence of natural selection acting on a polymorphic hybrid  
555 incompatibility locus in *Mimulus*. *Genetics*. 2015;199(2):543-54.
- 556 40. Vickery Jr RK. Case studies in the evolution of species complexes in *Mimulus*. *Evolutionary*  
557 *biology*: Springer; 1978. p. 405-507.
- 558 41. Sweigart A, Willis J. Patterns of nucleotide diversity are affected by mating system and  
559 asymmetric introgression in two species of *Mimulus*. *Evolution*. 2003;57:2490-506.
- 560 42. Gao Z-P, Yu Q-B, Zhao T-T, Ma Q, Chen G-X, Yang Z-N. A functional component of the  
561 transcriptionally active chromosome complex, *Arabidopsis* pTAC14, interacts with  
562 pTAC12/HEMERA and regulates plastid gene expression. *Plant physiology*. 2011;157(4):1733-45.
- 563 43. Hellsten U, Wright KM, Jenkins J, Shu S, Yuan Y, Wessler SR, et al. Fine-scale variation in  
564 meiotic recombination in *Mimulus* inferred from population shotgun sequencing. *Proceedings of*  
565 *the National Academy of Sciences*. 2013;110(48):19478-82.
- 566 44. Hajdukiewicz PT, Allison LA, Maliga P. The two RNA polymerases encoded by the nuclear  
567 and the plastid compartments transcribe distinct groups of genes in tobacco plastids. *The EMBO*  
568 *journal*. 1997;16(13):4041-8.

- 569 45. Swiatecka-Hagenbruch M, Liere K, Börner T. High diversity of plastidial promoters in  
570 *Arabidopsis thaliana*. *Molecular Genetics and Genomics*. 2007;277(6):725-34.
- 571 46. Kremnev D, Strand Å. Plastid encoded RNA polymerase activity and expression of  
572 photosynthesis genes required for embryo and seed development in *Arabidopsis*. *Frontiers in*  
573 *plant science*. 2014;5.
- 574 47. Demarsy E, Buhr F, Lambert E, Lerbs-Mache S. Characterization of the plastid-specific  
575 germination and seedling establishment transcriptional programme. *Journal of experimental*  
576 *botany*. 2012;63(2):925-39.
- 577 48. Ishizaki Y, Tsunoyama Y, Hatano K, Ando K, Kato K, Shinmyo A, et al. A nuclear-encoded  
578 sigma factor, *Arabidopsis* SIG6, recognizes sigma-70 type chloroplast promoters and regulates  
579 early chloroplast development in cotyledons. *The Plant Journal*. 2005;42(2):133-44.
- 580 49. Liere K, Börner T. Transcription and transcriptional regulation in plastids. *Cell and*  
581 *molecular biology of plastids*: Springer; 2007. p. 121-74.
- 582 50. Pfanschmidt T, Blanvillain R, Merendino L, Courtois F, Chevalier F, Liebers M, et al. Plastid  
583 RNA polymerases: orchestration of enzymes with different evolutionary origins controls  
584 chloroplast biogenesis during the plant life cycle. *Journal of experimental botany*.  
585 2015;66(22):6957-73.
- 586 51. Blevins T, Wang J, Pflieger D, Pontvianne F, Pikaard CS. Hybrid incompatibility caused by  
587 an epiallele. *Proceedings of the National Academy of Sciences*. 2017:201700368.
- 588 52. Lynch M, Conery JS. The Evolutionary Fate and Consequences of Duplicate Genes. *Science*.  
589 2000;290(5494):1151-5. doi: 10.1126/science.290.5494.1151.

- 590 53. Flagel LE, Wendel JF. Gene duplication and evolutionary novelty in plants. *New*  
591 *Phytologist*. 2009;183(3):557-64.
- 592 54. Flagel LE, Willis JH, Vision TJ. The standing pool of genomic structural variation in a natural  
593 population of *Mimulus guttatus*. *Genome biology and evolution*. 2013;6(1):53-64.
- 594 55. Kelly JK, Koseva B, Mojica JP. The genomic signal of partial sweeps in *Mimulus guttatus*.  
595 *Genome biology and evolution*. 2013;5(8):1457-69.
- 596 56. Mojica JP, Lee YW, Willis JH, Kelly JK. Spatially and temporally varying selection on  
597 intrapopulation quantitative trait loci for a life history trade-off in *Mimulus guttatus*. *Molecular*  
598 *Ecology*. 2012;21(15):3718-28.
- 599 57. Puzey JR, Willis JH, Kelly JK. Population structure and local selection yield high genomic  
600 variation in *Mimulus guttatus*. *Molecular ecology*. 2017;26(2):519-35.
- 601 58. Macnair M. A polymorphism for a lethal phenotype governed by two duplicate genes in  
602 *Mimulus*. *Heredity*. 1993;70:362-9.
- 603 59. Willis JH. Genetic analysis of inbreeding depression caused by chlorophyll-deficient lethals  
604 in *Mimulus guttatus*. *HEREDITY-LONDON-*. 1992;69:562-.
- 605 60. Bank C, Bürger R, Hermisson J. The Limits to Parapatric Speciation: Dobzhansky–Muller  
606 Incompatibilities in a Continent–Island Model. *Genetics*. 2012;191(3):845-63. doi:  
607 10.1534/genetics.111.137513. PubMed PMID: PMC3389979.
- 608 61. Barton N, Bengtsson BO. The barrier to genetic exchange between hybridising  
609 populations. *Heredity*. 1986;57(3):357-76.
- 610 62. Gavrilets S. Hybrid Zones With Dobzhansky-Type Epistatic Selection. *Evolution*.  
611 1997;51(4):1027-35. doi: 10.2307/2411031.

- 612 63. Kondrashov AS, Morgan M. Accumulation of Dobzhansky-Muller incompatibilities within  
613 a spatially structured population. *Evolution*. 2003;57(1):151-3.
- 614 64. Lemmon AR, Kirkpatrick M. Reinforcement and the genetics of hybrid incompatibilities.  
615 *Genetics*. 2006;173(2):1145-55.
- 616 65. Papp B, Pal C, Hurst LD. Dosage sensitivity and the evolution of gene families in yeast.  
617 *Nature*. 2003;424(6945):194.
- 618 66. Doyle J, Doyle J. Genomic plant DNA preparation from fresh tissue-CTAB method.  
619 *Phytochem Bull*. 1987;19(11):11-5.
- 620 67. Grigoriev IV, Nordberg H, Shabalov I, Aerts A, Cantor M, Goodstein D, et al. The Genome  
621 Portal of the Department of Energy Joint Genome Institute. *Nucleic Acids Research*.  
622 2012;40(D1):D26-D32. doi: 10.1093/nar/gkr947.
- 623 68. Nordberg H, Cantor M, Dusheyko S, Hua S, Poliakov A, Shabalov I, et al. The genome portal  
624 of the Department of Energy Joint Genome Institute: 2014 updates. *Nucleic Acids Research*.  
625 2014;42(Database issue):D26-D31. doi: 10.1093/nar/gkt1069. PubMed PMID: PMC3965075.
- 626 69. Hulce D, Li X, Snyder-Leiby T, Liu CJ. GeneMarker<sup>®</sup> genotyping software: tools to Increase  
627 the statistical power of DNA fragment analysis. *Journal of biomolecular techniques: JBT*.  
628 2011;22(Suppl):S35.
- 629 70. Li H, Durbin R. Fast and accurate long-read alignment with Burrows–Wheeler transform.  
630 *Bioinformatics*. 2010;26(5):589-95.
- 631 71. Li H, Handsaker B, Wysoker A, Fennell T, Ruan J, Homer N, et al. The sequence  
632 alignment/map format and SAMtools. *Bioinformatics*. 2009;25(16):2078-9.

- 633 72. Trapnell C, Roberts A, Goff L, Pertea G, Kim D, Kelley DR, et al. Differential gene and  
634 transcript expression analysis of RNA-seq experiments with TopHat and Cufflinks. *Nat Protocols*.  
635 2012;7(3):562-78.
- 636 73. Kim D, Pertea G, Trapnell C, Pimentel H, Kelley R, Salzberg SL. TopHat2: accurate  
637 alignment of transcriptomes in the presence of insertions, deletions and gene fusions. *Genome*  
638 *biology*. 2013;14(4):R36.
- 639 74. Team RC. R language definition. Vienna, Austria: R foundation for statistical computing.  
640 2000.
- 641 75. Beißbarth T, Speed TP. GStat: find statistically overrepresented Gene Ontologies within  
642 a group of genes. *Bioinformatics*. 2004;20(9):1464-5.
- 643 76. Boyle EI, Weng S, Gollub J, Jin H, Botstein D, Cherry JM, et al. GO:: TermFinder—open  
644 source software for accessing Gene Ontology information and finding significantly enriched Gene  
645 Ontology terms associated with a list of genes. *Bioinformatics*. 2004;20(18):3710-5.
- 646 77. Guindon S, Dufayard J-F, Lefort V, Anisimova M, Hordijk W, Gascuel O. New algorithms  
647 and methods to estimate maximum-likelihood phylogenies: assessing the performance of PhyML  
648 3.0. *Systematic biology*. 2010;59(3):307-21.

649

650

651 **Fig 1: Two-locus genotypes of green and white seedlings at markers linked to *h13* and *h14*.**

652 Count represents the number of F2s with a given genotype. Genotypes are homozygous *M.*  
653 *guttatus* ('G'), homozygous *M. nasutus* ('N'), and heterozygous ('H'). The vast majority (92%) of  
654 white F2s carry the G:N genotype, whereas green F2s carry all genotypes except G:N. Sample size

655 is 2,652, which represents the subset of our mapping population that was genotyped with  
656 markers M208, M236, M241, and M132.

657

658 **Fig 2: Fine-mapping localizes hybrid lethality loci to small genomic intervals.** (A) *hl13* maps to a  
659 72kb region on scaffold 115 containing 22 genes. (B) *hl14* maps to a 51.6kb region on scaffold  
660 291 containing 6 genes and a gap in the reference genome (red box) of unknown size. Horizontal  
661 bars represent F2 recombinants that were informative for mapping *hl13* (between M208 and  
662 M255) and *hl14* (between M280 and M241), where marker genotypes are yellow (homozygous  
663 for DPRG102 alleles), blue (homozygous for DPRN104 alleles), and green (heterozygous). F2  
664 individual used for mapping, F2 phenotype (white or green), genotype at partner locus  
665 (DPRG102, DPRN104, or heterozygous), and green:white ratio of F3 progeny are given for each  
666 recombinant. Vertical and diagonal hatch marks are marker positions and breaks within/between  
667 scaffolds, respectively. Scaffolds from v1.1 of the reference genome are included in figure,  
668 though all gene annotation and naming is based on the updated v2.0 assembly (phytozome.org).  
669

670 **Fig 3: Duplicate copies of pTAC14 map to both hybrid lethality loci in *M. guttatus*.** (A) Ten SNPs  
671 differentiate Mg.pTAC14\_1 (G1), Mg.pTAC14\_2 (G2), and Mnas.pTAC14 (N1). (B) Phenotype:  
672 green (GRN) or white (WHT) F2. hl13 and hl14: genotype at flanking markers [G (DPRG102), N  
673 (DPRN104, and G/N (heterozygous)]. N is sample size. Observed: Copies of *pTAC14* observed in  
674 each F2, consistent across all F2s for a given genotype. Note that individuals with DPRG102 alleles  
675 at hl13 always carry Mg.pTAC14\_1, individuals with DPRG102 alleles at hl14 always carry

676 Mg.pTAC14\_2, and individuals with DPRN104 alleles at hl13 always carry Mnas.pTAC14. (C)  
677 Location of different copies of pTAC14 based on our mapping experiment.

678

679 **Fig 4: *pTAC14* gene structure and neighbor-joining tree.** (A) Gene model of *pTAC14* in *Mimulus*  
680 is shown along the top. A frameshift mutation in the G1 copy of *pTAC14* (DPRG102,  
681 *Mg.pTAC14\_1*) is caused by the insertion of an adenine in the 7<sup>th</sup> exon, highlighted with a box.  
682 (B) Unrooted neighbor-joining tree of *pTAC14* genes from DPRG102, DPRN104, and the IM62  
683 reference genome. Bootstrap support given at node and substitution rate shown for scale.

684

685 **Fig 5: Genome-wide patterns of differential expression.** Average log<sub>2</sub> fold-change among the  
686 1,092 genes (representing 3% of annotated genes) that are significantly differentially expressed  
687 in all pairwise comparisons of white (F2) and green (DPRG102, DPRN104, F2) seedlings. Genes  
688 above and below line are over- and underexpressed in white seedlings, respectively. Annotated  
689 pTAC14 duplicates are shown as red dots.

690

691 **Fig 6: Misexpression of chloroplast genome in white seedlings.** Heat map displaying expression  
692 patterns of 52 chloroplast genes from seven chloroplast gene families in seedlings from  
693 DPRG102, DPRN104, Green F2s and White F2s. Z-scores of normalized FPKM values were  
694 calculated for each row to illustrate relative expression differences among genes. Bars on left of  
695 heatmap indicate whether genes are primarily transcribed by PEP, PEP and NEP, or NEP RNA  
696 polymerases. \*denotes genes that are significantly differentially expressed between white  
697 seedlings and all green seedlings (DPRG102, DPRN104, and Green F2s).



698

699 **Figure 7: Hypothetical model for the evolution of *pTAC14*.** Prior to gene duplication the ancestral  
700 *M. guttatus*-like population harbored genetic variation for *pTAC14* at *h13* (different colored  
701 boxes represent genetic variation at *pTAC14*). During speciation, *M. nasutus* acquired a copy of  
702 *pTAC14* harboring 'blue' variation (left). Similarly, the *M. guttatus*-specific duplication involved a  
703 closely related 'blue' *pTAC14* variant. Contemporary variation within *M. nasutus* and *pTAC14*  
704 variants located at *h14* resemble one another genetically due to common ancestry, while  
705 *pTAC14* variants at *h13* in *M. guttatus* continue to harbor considerable genetic variation,  
706 including variants that contain functional (IM62) and non-functional (DPRG102) variants.

707

708 **Fig S1: Hybrid lethality phenotype.** White seedlings segregate in 1:15 in reciprocal F2 hybrids of  
709 *M. guttatus* (DPRG102) and *M. nasutus* (DPRN104). Photos kindly provided by Adam J Bewick.

710

711 **Fig S2: Bulked Segregant Analysis of green and white F3 pools.** Difference in average allele  
712 frequency between green and white pools (plotted along the fourteen *Mimulus* chromosomes)  
713 was calculated in 200-SNP windows with 100-SNP overlap. The 0.5% most divergent windows are  
714 highlighted as black dots, which are all located at the distal end of chromosome 13 in contiguous  
715 windows and represent the candidate *h13* region. Red dots, which overlap with the previously  
716 mapped interval for *h14*, show the 0.5% least divergent windows (calculated as absolute  
717 difference in allele frequency).

718

719 **Fig S3: Genomic sequence alignment of *pTAC14* variants.** Exons are highlighted blue. Black boxes  
720 show ten SNPs that were used to positionally map copies *Mg.pTAC14\_1*, *Mg.pTAC14\_2*, and  
721 *Mn.pTAC14\_1* in DPRN104 x DPRG102 F2 seedlings. Red box indicates site of frameshift mutation  
722 in *Mg.pTAC14\_1*.

723

724 **Fig S4: *pTAC14* is not expressed in white seedlings.** PCR products run on 1% agarose gel with 2-  
725 log ladder. Control transcript is Migut.M00195 (ACYL-COENZYME A OXIDASE-LIKE PROTEIN). Note  
726 that DNA and RNA was extracted from pools of 10 seedlings for each genotype.

727

728 **Fig S5: Misexpression of key photosynthetic genes indicates PEP inactivity.** Differential  
729 expression among chloroplast genes transcribed by PEP (*psaA*, *psaB*, *psbA*, *psbB*, *petB*, *petD*), PEP  
730 and NEP (*atpA* and *ndhB*), and NEP (*rpoA*, *rpoB*, and *rpoC1*). Green: average log<sub>2</sub> fold-change in  
731 all pairwise comparisons among green seedlings (DPRG102, DPRN104, Green F2). White: average  
732 log<sub>2</sub> fold-change in pairwise comparisons between white F2 seedlings and green seedlings.  
733 \*Significantly down-regulated in white seedlings (all pairwise comparisons,  $p < 5.0^{-5}$ ).  
734 \*\*Significantly up-regulated in white seedlings (all pairwise comparisons,  $p < 5.0^{-5}$ ).

735

736 **Table S1:** Segregation of white seedlings in parental and reciprocal hybrid crosses.

737

738 **Table S2:** Candidate genes at *h/13* and *h/14*.

739

740 **Table S3:** GO term enrichment of differentially expressed genes

741

742 **Table S4:** Genotyping and sequencing primers used for fine-mapping.

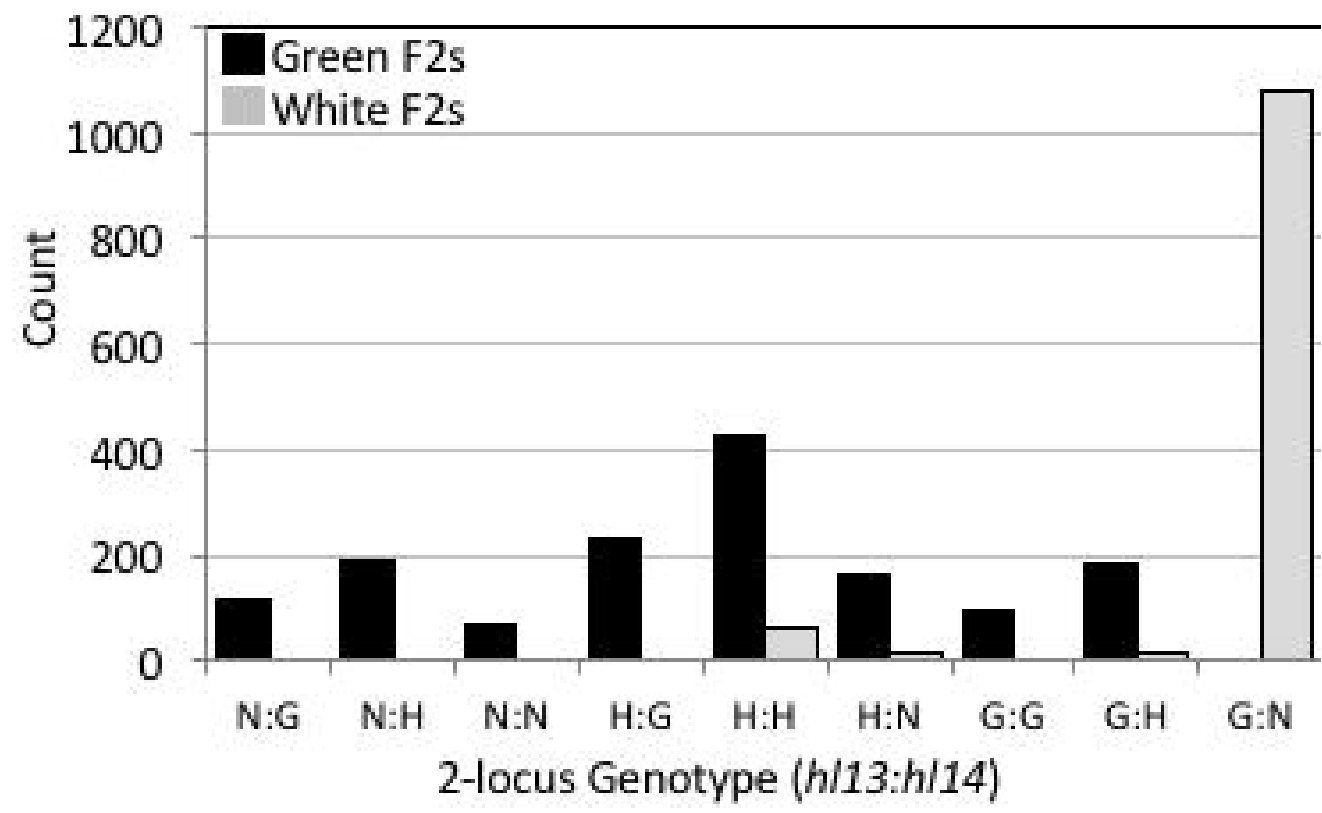



A) G1: A T C G T G A A A A  
 G2: G A C A T G G G G G  
 N1: G A T G A A G A A A

B)

| <u>Phenotype</u> | <u>hl13</u> | <u>hl14</u> | <u>N</u> | <u>Observed</u> |
|------------------|-------------|-------------|----------|-----------------|
| GRN              | G           | G           | 10       | G1&G2           |
| GRN              | G           | G/N         | 10       | G1&G2           |
| WHT              | G           | N           | 16       | G1              |
| GRN              | G/N         | G           | 10       | G1&N1&G2        |
| GRN              | G/N         | G/N         | 10       | G1&N1&G2        |
| GRN              | G/N         | N           | 10       | G1&N1           |
| GRN              | N           | G           | 10       | N1&G2           |
| GRN              | N           | G/N         | 10       | N1&G2           |
| GRN              | N           | N           | 10       | N1              |

C) *M. guttatus*      *M. nasutus*  
hl13    hl14      hl13    hl14  
 G1      G2          N1      -

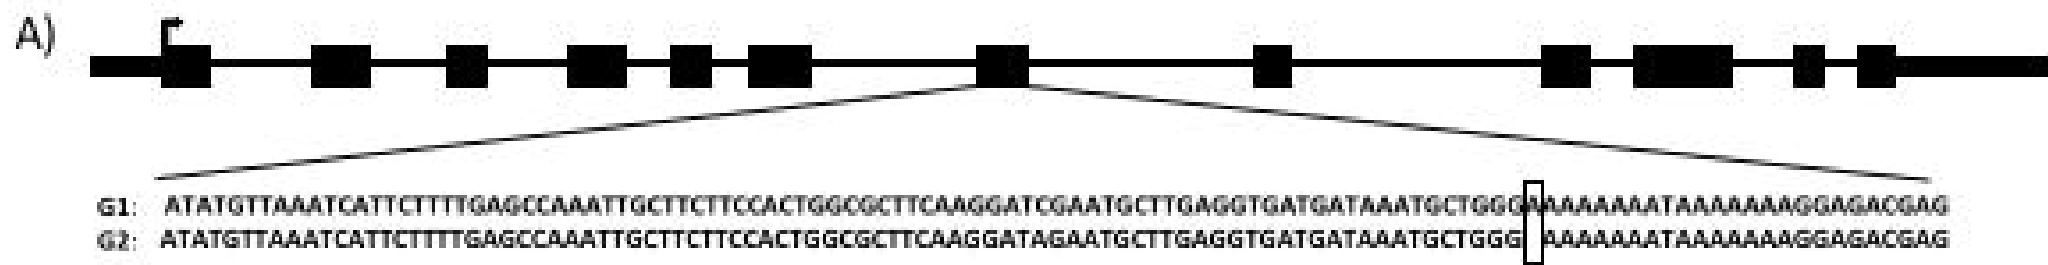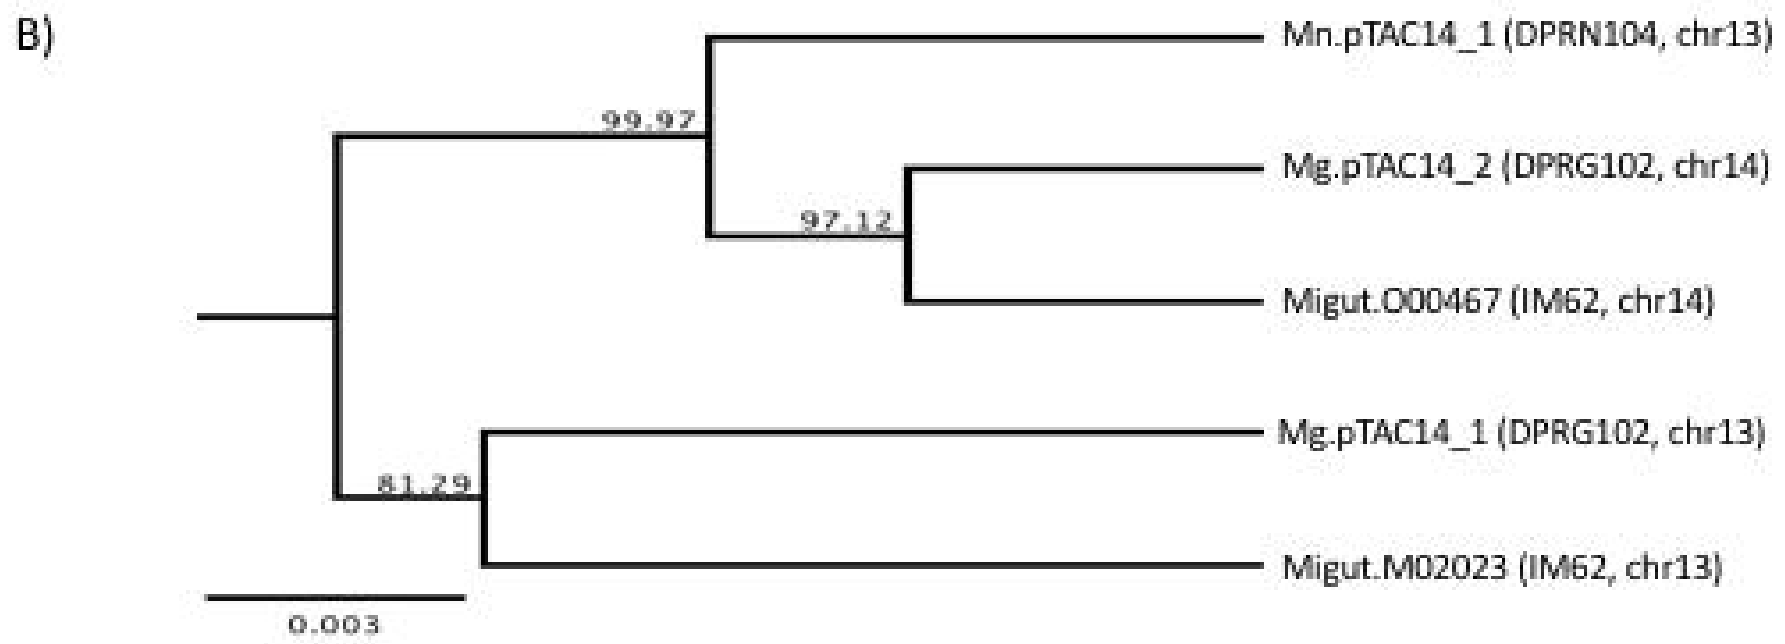

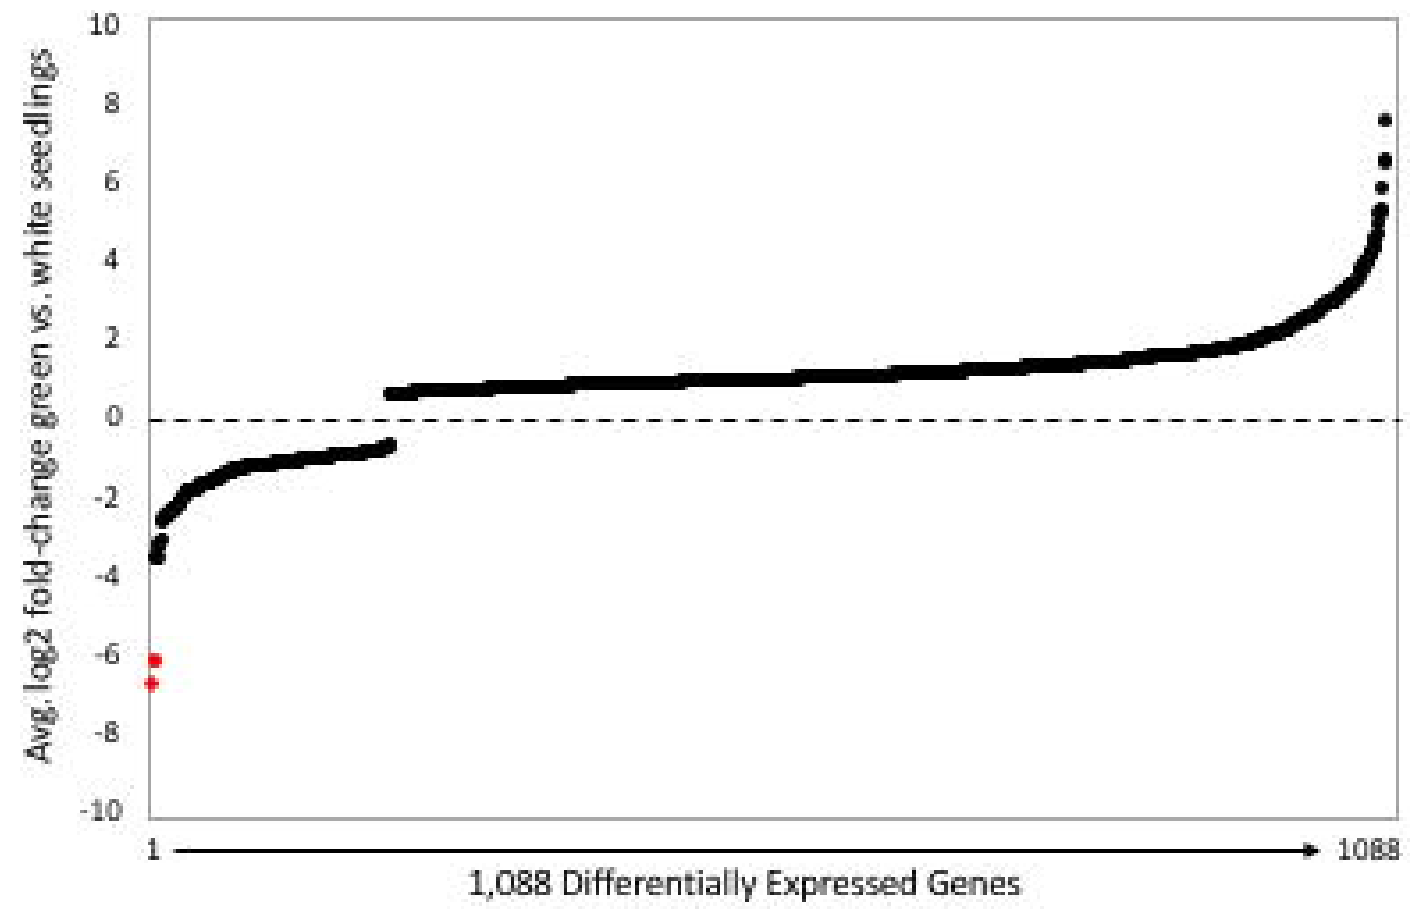



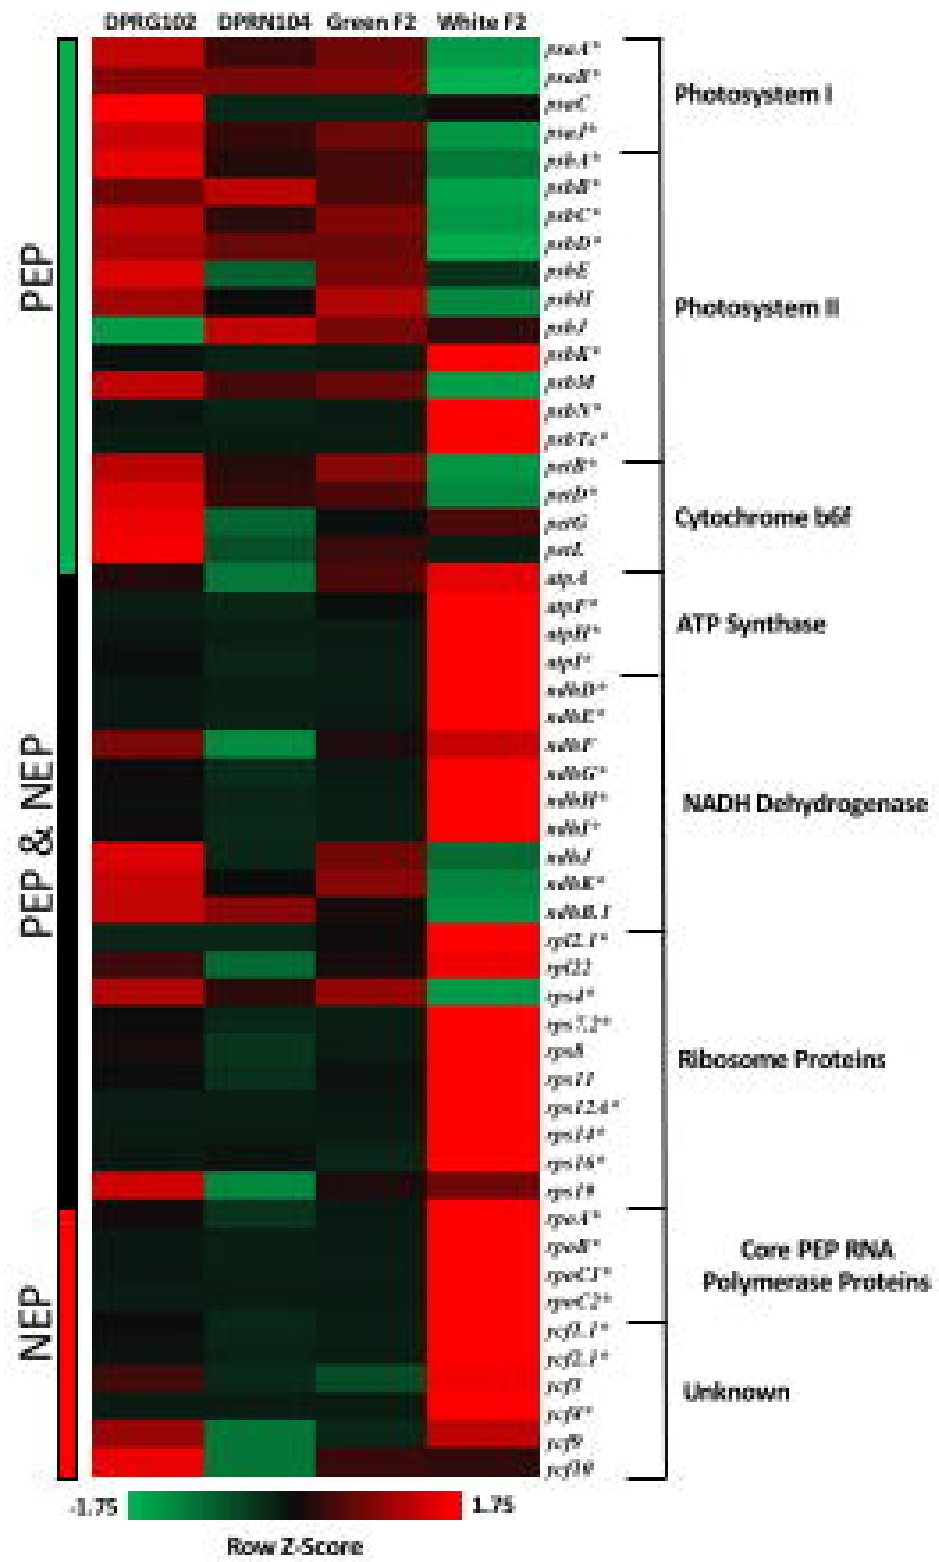

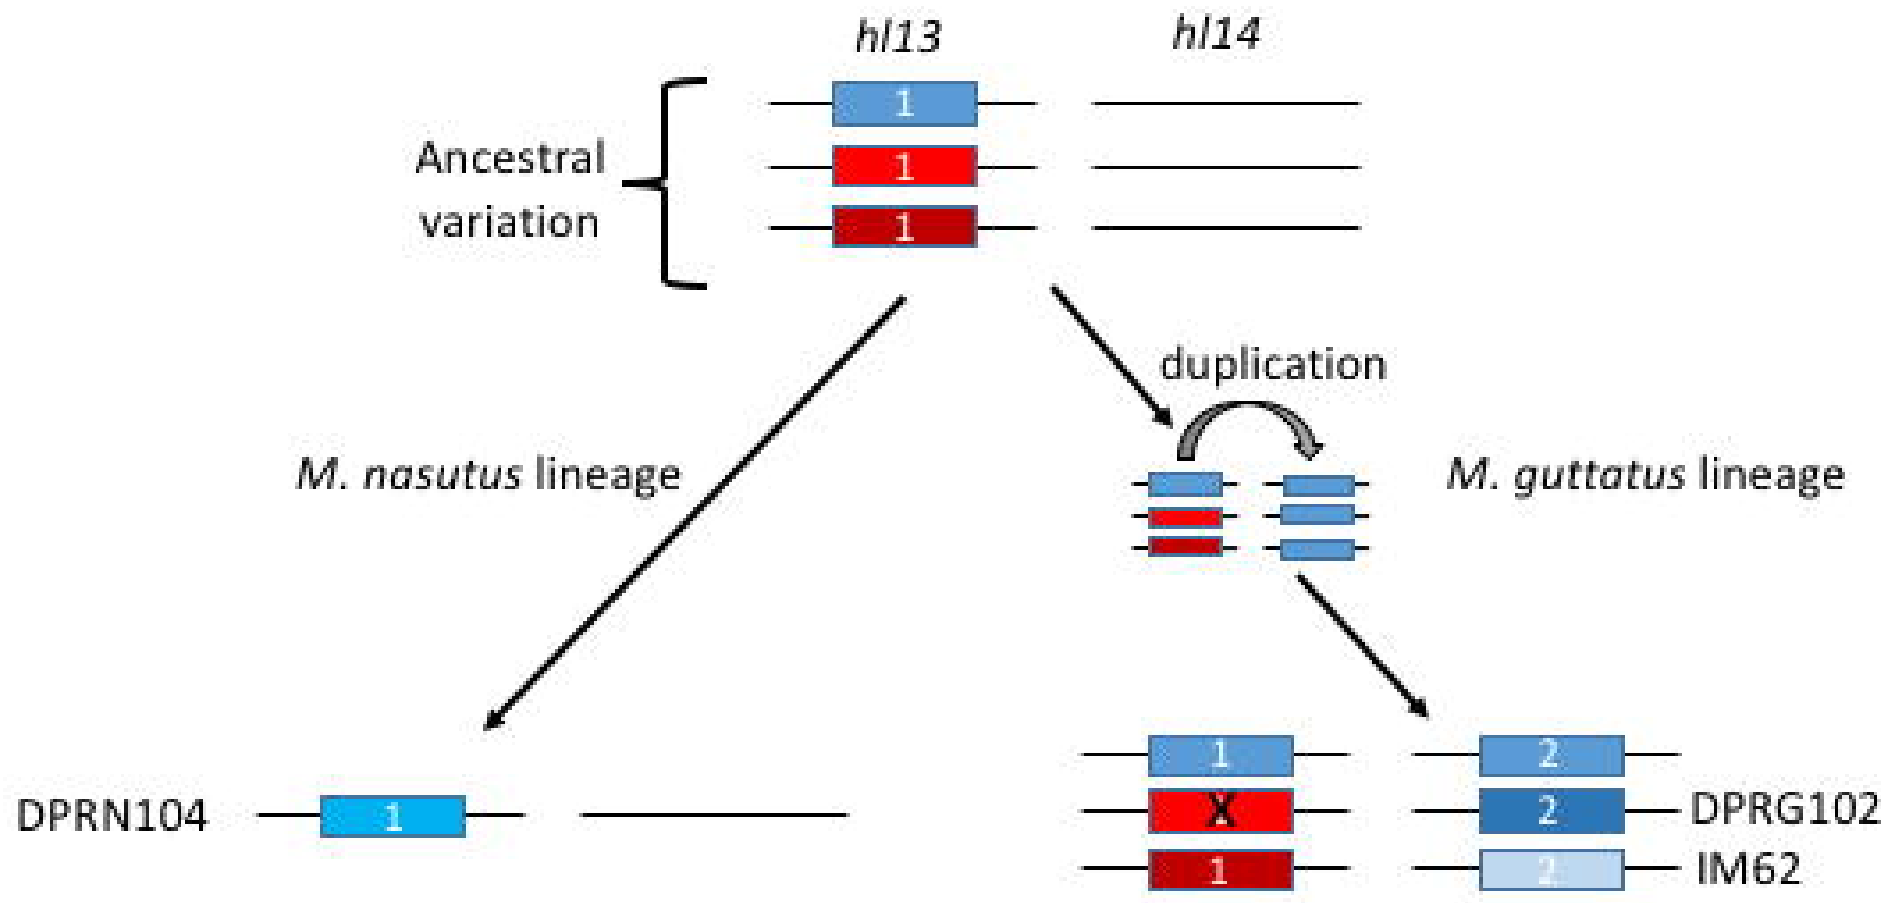

Source: https://www.biorxiv.org/content/10.1101/201392v1.full.pdf
